# Supplementary material for: Fetal weight estimation, evaluation of different methods
Source: Research Square preprint supplement (doi:10.21203/rs.3.rs-6395306/v1), 2025-08-07
Supplement: Supplementary file 4 [file c04fa5cc2294ce620e84f29c.pdf]

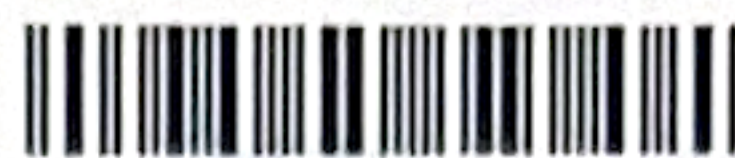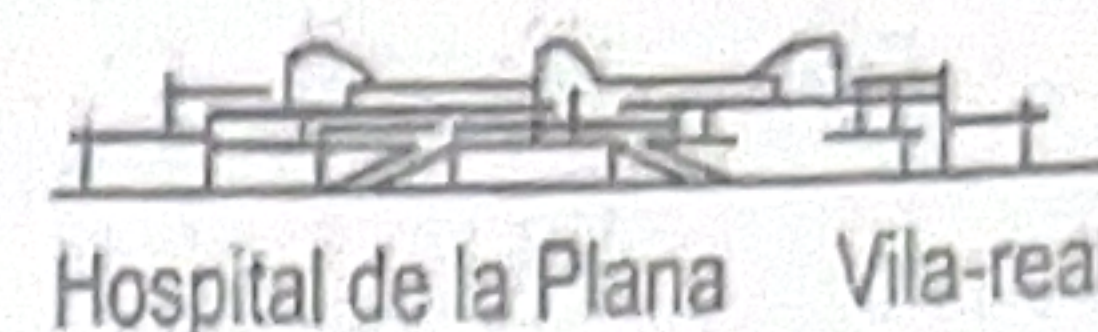

EL ESTUDIO

## “ESTIMACIÓN DE PESO FETAL; VALORACIÓN DE DIFERENTES MÉTODOS DE CÁLCULO”

### Objetivo de la investigación

El objetivo de esta investigación es aplicar técnicas ecográficas específicas para el estudio del crecimiento fetal, valorar la normalidad dentro de nuestra población y mejorar la detección de patrones de crecimiento patológicos. Para ello, realizaremos varias ecografías especiales de cálculo de peso fetal (además de las ecografías rutinarias del control del embarazo).

### Riesgos y beneficios

El estudio no conlleva ningún riesgo para el feto ni para la madre. No recibirán compensación económica por participar.

A pesar de la mejora en las técnicas de diagnóstico prenatal, hay determinadas malformaciones fetales y enfermedades que no se pueden detectar intraútero.

### Participación voluntaria. Confidencialidad

La participación en este estudio es estrictamente voluntaria. La información que se recoja será confidencial y no se usará para ningún otro propósito fuera de los de esta investigación. Sus datos serán tratados conforme a la Ley Orgánica 15/1999 de 13 de diciembre de protección de datos de carácter personal.

Su nombre no será utilizado en ningún informe cuando los resultados de la investigación sean publicados.

Si tiene alguna duda sobre este proyecto, puede contactar en el nº de teléfono personal de Laura Almenar Agustí 635099382. ( Teléfono de la secretaria del



servicio de Ginecología y Obstetricia por si no es posible contactar en el primer nº, 964357687).

Igualmente, puede retirarse del proyecto en cualquier momento sin que eso le perjudique en ninguna forma.

Para retirarse del proyecto puede remitir una carta por correo postal dirigido a Dra Laura Almenar Agustí, investigadora principal del estudio "Estimación de peso fetal, valoración de diferentes métodos de cálculos", con el fin de ejercer los derechos de acceso, rectificación, cancelación y oposición.

La dirección de envío será Carretera de Vila-real a Burriana, km 0,5, CP 12540, Vila-real, Castellón.



## AUTORIZACIÓN

Acepto participar voluntariamente en esta investigación, conducida por Laura Almenar Agustí. He sido informada de que la meta de este estudio es aplicar nuevas técnicas ecográficas para el estudio de la detección de crecimiento fetal, valorar los parámetros de normalidad en nuestro medio y mejorar la detección de fetos que presentan crecimiento fetal anormal.

Reconozco que la información que yo provea en el curso de esta investigación es estrictamente confidencial y no será usada para ningún otro propósito fuera de los de este estudio sin mi consentimiento.

He sido informado de que puedo hacer preguntas sobre el proyecto en cualquier momento y que puedo retirarme del mismo cuando así lo decida, sin que esto acarree perjuicio alguno para mi asistencia sanitaria.

De conformidad con lo dispuesto en la Ley Orgánica 15/1999, de Protección de Datos, el Hospital de la Plana informa que los datos facilitados a través del presente impreso, serán incorporados a un fichero de Pacientes y serán tratados de manera automatizada.

La finalidad del fichero es servir como soporte de información a la gestión de los datos de los pacientes y de su historia clínica y de las tareas administrativas derivadas de la prestación asistencial.

Si lo desea, puede remitir un correo postal dirigido la Dra Laura Almenar Agustí, investigadora principal, del estudio "Estimación de peso fetal, valoración de diferentes métodos de cálculos" a la dirección Carretera de Vila-Real a Burriana, km 0,5, CP 12540, Vila-Real, Castellón. , con el fin de ejercer los derechos de acceso, rectificación, cancelación y oposición.



Nombre del Participante

Firma del Participante

Xochitl

En Vila- Real, a 18 de 01 de 2020
